# Supplementary material for: A Secondary Retrospective Analysis of the Predictive Value of Neutrophil-Reactive Intensity (NEUT-RI) in Septic and Non-Septic Patients in Intensive Care
Source: MDPI journal article supplement (doi:10.3390/diagnostics14080821), 2024-04-16
Supplement: s1 [file s1]

## Supplementary material

**Table S1.** Comparison of inflammatory parameters between patients with "renal failure" and patients with "normal renal function."

|                   | Renal Failure<br>(n=70) | Normal renal function<br>(n=130) | P       |
|-------------------|-------------------------|----------------------------------|---------|
| <b>Age</b>        | 75.50 [67.00 - 80.00]   | 71.00 [56.00 - 77.00]            | 0.006   |
| <b>Male%</b>      | 42.9                    | 54.6                             | 0.150   |
| <b>Creatinine</b> | 2.12 [1.59 - 3.73]      | 0.89 [0.69 - 1.25]               | < 0.001 |
| <b>CRP</b>        | 21.20 [12.31 - 134.65]  | 11.37 [2.25 - 32.53]             | < 0.001 |
| <b>PCT</b>        | 11.91 [1.02 - 63.71]    | 0.68 [0.32 - 3.24]               | < 0.001 |
| <b>NEUT-RI</b>    | 52.15 [47.95 - 56.48]   | 48.70 [46.60 - 52.58]            | 0.002   |

**Table S2:** NEUT-RI, PCT and CRP values for the detection of septic and non-septic patients.

|                | AUROC<br>(95% CI)     | Cut-off | Sens<br>(95% CI)      | Spec<br>(95% CI)    | PPV<br>(95% CI)     | NPV<br>(95% CI)     |
|----------------|-----------------------|---------|-----------------------|---------------------|---------------------|---------------------|
| <b>NEUT-RI</b> | 0.79 [0.73 - 0.86]    | 50.75   | 70.9<br>[60.4 - 79.7] | 80.7<br>[71.6-88.1] | 75.6<br>[65.1-84.2] | 77.2<br>[68.4-84.5] |
| <b>CRP</b>     | 0.73<br>[0.66 - 0.80] | 7.38    | 84.6<br>[75.8-91.2]   | 56.2<br>[45.5-64.0] | 65.8<br>[56.5-74.3] | 77.8<br>[65.5-87.3] |
| <b>PCT</b>     | 0.76<br>[0.69 - 0.84] | 2.17    | 62.9<br>[52.8 - 74.2] | 82.9<br>[76.4-90]   | 82.3<br>[71.2-90]   | 63.7<br>[52.9-73.6] |

There were not statistically significant differences between AUROC of the three parameters (NEUT-RI vs PCT  $p=0.83$ , NEUT-RI vs CRP  $p=0.29$ , DeLong's test for two correlated ROC curves). The CRP specificity is statistically different from the NEUT-RI specificity ( $p=0.01$ , specificity test for two correlated ROC curves) and from PCT specificity ( $p=0.007$ , specificity test for two correlated ROC curves). AUROC= Area Under the ROC curve; Sens = Sensibility; Spec = Specificity; PPV= Positive Predictive Value; NPV= Negative Predictive Value; NEUT-RI= Neutrophil-Reactive Intensity; PCT= procalcitonin; CRP= C-reactive protein

**Table S3.** NEUT-RI and PCT values for discriminating between "survivors" and "deceased" at 28 days.

|                | <b>AUROC<br/>(95% CI)</b> | <b>Cut-off</b> | <b>Sens<br/>(95% CI)</b> | <b>Spec<br/>(95% CI)</b> | <b>PPV<br/>(95% CI)</b> | <b>NPV<br/>(95% CI)</b> |
|----------------|---------------------------|----------------|--------------------------|--------------------------|-------------------------|-------------------------|
| <b>NEUT-RI</b> | 0.70[0.56-0.83]           | 53.6           | 62.5<br>[39.5-81.3]      | 76.9<br>[68.7-82.3]      | 28.30<br>[16.8-42.34]   | 93.0<br>[87.17-96.76]   |
| <b>PCT</b>     | 0.76<br>[0.65-0.88]       | 12.18          | 76.2<br>[54.6-90.5]      | 79.9<br>[71.5-84.6]      | 38.09<br>[23.6-54.3]    | 95.10<br>[88.93-98.39]  |

There were not statistically significant differences between AUROC of the two parameters ( $p=0.57$ , DeLong's test for two correlated ROC curves). AUROC= Area Under the ROC curve; Sens = Sensibility; Spec = Specificity; PPV= Positive Predictive Value; NPV= Negative Predictive Value; NEUT-RI= Neutrophil-Reactive Intensity; PCT= procalcitonin

**Table S4.** NEUT-RI and PCT at ICU admission time, after 48 and 96 hours in septic patients.

|                                | <b>Admission<br/>time</b> | <b>48 hours</b>      | <b>96 hours</b>        | <b>p-value<br/>(ANOVA)</b> | <b>P values pairwise comparisons</b> |                      |                       |
|--------------------------------|---------------------------|----------------------|------------------------|----------------------------|--------------------------------------|----------------------|-----------------------|
|                                |                           |                      |                        |                            | <b>0h vs<br/>48h</b>                 | <b>0h vs<br/>96h</b> | <b>48h vs<br/>96h</b> |
| <b>NEUT-RI (FI)<br/>(n=59)</b> | 52.70<br>[49.65-56.80]    | 53<br>[49.00-57.60]  | 50.50<br>[47.60-52.90] | 0.0002                     | 1                                    | 0.0011               | <0.0001               |
| <b>PCT (ng/ml)<br/>(n=63)</b>  | 6.36<br>[0.52-36.95]      | 5.51<br>[0.90-34.82] | 1.65<br>[0.53-5.74]    | <0.0001                    | 0.01                                 | <0.0001              | <0.0001               |

**Figure S1.** NEUT-RI and CRP depending on the site of infection in “septic” group.

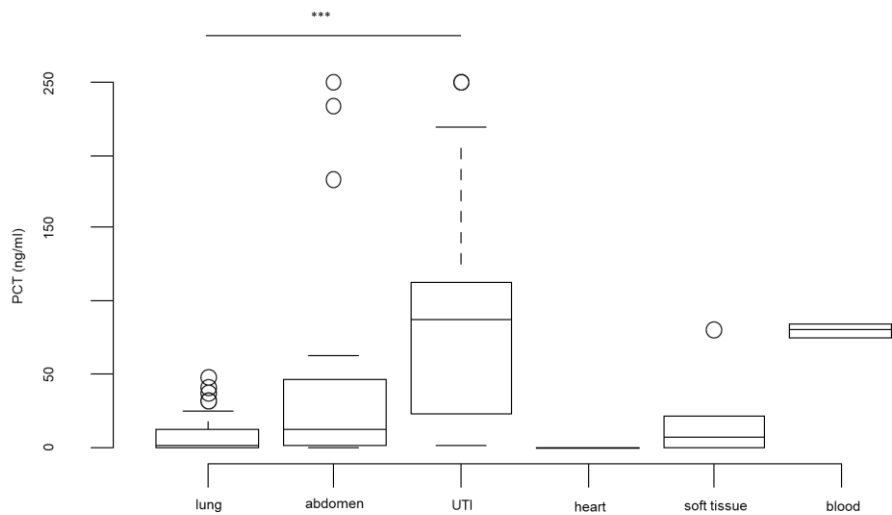

There were no differences in NEUT-RI and CRP depending on the site of infection in “septic” group. There was a statistically significant difference in PCT depending on site of infection ( $p < 0.001$ , Kruskal-Wallis rank sum test), in particular PCT was higher in patients with kidney or urinary tract infection compared to lung infection (88.50 [24.20-113.00] vs 1.64[0.39-12.54],  $p < 0.001$  Pairwise comparisons using Wilcoxon rank sum test with continuity correction).
